# Supplementary material for: How does practice modulate fake production costs in basketball? Analyses of frequency distributions and mixture effects
Source: Research Square preprint supplement (doi:10.21203/rs.3.rs-3686902/v1), 2023-12-14
Supplement: Supplementary file 1 [file ca85c1a122cfe690fcc86705.docx]

**Appendix: A**

*Notes.* Post-hoc paired samples t-tests for theinteraction of the factors *ISI* and *Day of practice* for Mu. Asterisk mark significant differences: * for *p* < .05; ** for *p* < .01, *** for *p* < .001.
